# 1 Explanation of Hand, Foot, and Mouth Disease 2 Cases in Japan Using Google Trends Before 3 and During the COVID-19: Infodemiology Study

4  
5 Qian Niu,<sup>1\*</sup> MS; Junyu Liu,<sup>2\*</sup> ME; Zixi Zhao,<sup>1</sup> MS; Miyu Onishi,<sup>1</sup> BS; Asuka Kawaguchi,<sup>1</sup> BS;  
6 Anuradhi Bandara,<sup>1</sup> BS; Keiko Harada,<sup>1</sup> MS; Tomoki Aoyama,<sup>1</sup> MD, PhD; Momoko Nagai-  
7 Tanima,<sup>1</sup> PhD

8  
9 <sup>1</sup> Department of Human Health Sciences, Graduate School of Medicine, Kyoto University,  
10 Kyoto, Japan

11 <sup>2</sup> Department of Intelligence Science and Technology, Graduate School of Informatics, Kyoto  
12 University, Kyoto, Japan

13  
14  
15 \* Qian Niu and Junyu Liu contributed equally to this article.  
16  
17  
18  
19  
20  
21  
22  
23  
24  
25

26 Corresponding Author  
27 Momoko Nagai-Tanima, PhD  
28 Department of Human Health Sciences,  
29 Graduate School of Medicine,  
30 Kyoto University,  
31 53, Kawahara-Cho, Shogoin, Sakyo-Ku  
32 Kyoto, 606-8507  
33 Japan  
34 Phone: 075-751-3964  
35 Email: [tanima.momoko.8s@kyoto-u.ac.jp](mailto:tanima.momoko.8s@kyoto-u.ac.jp)  
36  
37  
38  
39  
40  
41

## 42 **Abstract**

43 **Background:** COVID-19 pandemic affected common disease infections, while the impact on  
44 hand, foot, and mouth disease (HFMD) is unclear. Google Trends data is beneficial in  
45 approximately real-time statistics and easily accessed, expecting to be used for infection  
46 explanation from information-seeking behavior perspectives. We aimed to explain HFMD  
47 cases before and during COVID-19 using Google Trends data.

48 **Methods:** HFMD cases were obtained from the National Institute of Infectious Disease, and  
49 Google search data from 2009 to 2021 was downloaded using Google Trends in Japan.  
50 Pearson correlation coefficients were calculated between HFMD cases and the search topic  
51 “HFMD” from 2009 to 2021. Japanese tweets containing “HFMD” were retrieved to select  
52 search terms for further analysis. Search terms were retained with counts larger than 1000  
53 and belonging to ranges of infection sources, susceptible sites, susceptible populations,  
54 symptoms, treatment, preventive measures, and identified diseases. Cross-correlation  
55 analyses were conducted to detect lag changes between HFMD cases and HFMD search  
56 terms before and during COVID-19. Multiple linear regressions with backward elimination  
57 processing were used to identify the most significant terms for HFMD explanation.

58 **Results:** HFMD cases and Google search volume peaked around July in most years without  
59 2020 and 2021. The search topic “HFMD” presented strong correlations with HFMD cases  
60 except in 2020 when COVID-19 outbreaked. In addition, differences in lags for 73 (72.3%)  
61 search terms were negative, might indicating increasing public awareness of HFMD  
62 infections during the COVID-19 pandemic. Results of multiple linear regression  
63 demonstrated that significant search terms contained the same meanings but expanded  
64 informative search content during COVID-19.

65 **Conclusions:** Significant terms for HFMD cases explanation before and during COVID-19  
66 were different. The awareness of HFMD infection in Japan may improve during the COVID-  
67 19 pandemic. Continuous monitoring is important to promote public health and prevent  
68 resurgence. Public interest reflected in information-seeking behavior can be helpful for public  
69 health surveillance.

70

71 **Keywords:** HFMD, Infodemiology, Google Trends, Infection, Explanation

## 72 Background

73 Hand, foot, and mouth disease (HFMD) is an infectious disease that results in a blistering  
74 rash on the mouth, hands, and feet. Most infected individuals recover from HFMD within a  
75 few days. Various comorbidities, including myocarditis, neurogenic pulmonary edema, acute  
76 flaccid paralysis, and central nervous system complications, such as meningitis, cerebellar  
77 ataxia, and encephalitis, can also occur [1, 2]. HFMD has a worldwide distribution that  
78 outbreaks often occur during summer and early fall in the United States. Large outbreaks in  
79 Cambodia, China, Japan, Korea, Malaysia, Singapore, Thailand, and Vietnam have been  
80 reported in the past 2 decades [3, 4]. HFMD is seasonal in temperate Asia with a summer  
81 peak and subtropical Asia with spring and fall peaks, but not in tropical Asia, indicating a  
82 climatic role was identified for temperate Japan [5]. During the summer of 2011, Japan had  
83 the largest epidemic of HFMD on record, with 347,362 cases reported [6]. Coxsackievirus A6  
84 (CV-A6) infection was responsible for most cases, with co-circulation of coxsackievirus A16  
85 (CV-A16) and enterovirus A71 (EV-A71) [7]. EV-A71 has been sporadically detected from  
86 October 2014 onward. It became the predominant serotype in 2018, with approximately  
87 70,000 reported cases, following an increased spread from the end of 2017 [8]. Since June  
88 2019, a severe outbreak of HFMD has occurred in multiple regions of Japan, attracting  
89 public attention again [9]. As enteroviruses can spread rapidly by droplet and fomite  
90 transmission among children in daycare centers and kindergartens, understanding HFMD  
91 outbreaks is vital to public health, particularly during COVID [10].

92  
93 Rapid recognition and reporting of HFMD infection are essential, and several studies have  
94 constructed models for explaining HFMD infection [11–15]. Rui et al. explored  
95 epidemiological characteristics and calculated the early warning signals of HFMD using a  
96 logistic differential equation (LDE) model in seven regions of China [11]. Yu et al. forecasted  
97 the number of HFMD cases with wavelet-based hybrid models in Zhengzhou, China [12].  
98 Zhang et al. proposed a landscape dynamic network marker (L-DNM) to detect pre-outbreak  
99 signals of HFMD in Tokyo, Hokkaido, and Osaka, Japan [13]. Gao et al. used monthly  
100 HFMD infection cases and meteorological data to construct a weather-based early warning  
101 model with a generalized additive model across China [14]. Zhao et al. used a meta-learning  
102 framework and combines Baidu search queries for real-time estimation of HFMD cases [15].  
103 The above studies used a range of data, including monthly or weekly HFMD infectious cases  
104 [11, 12, 14], dynamic information from city networks, horizontal high-dimensional data,  
105 records of clinic visits [13], meteorological data [14], and Baidu search queries data [15].  
106 which are relatively difficult to access or delayed updates in Japan. Traditional surveillance  
107 and reporting systems lag an outbreak by one to two weeks because of the reporting and  
108 verification process. In Japan, the National Institute of Infectious Disease (NIID) has  
109 monitored the outbreak of various infectious diseases and issued weekly reports since 1999,  
110 but delayed for several weeks [16]. In addition, no studies have focused on changes in  
111 HFMD affected by the COVID-19 pandemic by Internet searching data compared with  
112 previous studies. As of August 2022, Google search data was considered reliable because  
113 its market share in Japan has been over 70% since 2009 [17, 18]. Google Trends data  
114 shows the information that the public is searching for more real-time and labor-saving, which  
115 may be valuable for infection surveillance.

116

117 The science of distribution and determinants of information in an electronic medium,  
118 specifically the Internet, or in a population, to inform public health and policy is defined as  
119 “infodemiology” [19]. Google Trends is frequently used in infodemiology research to gauge  
120 public interest [20]. Google Trends reflects public information-seeking behavior and allows  
121 users to analyze Google search data for specific search terms in any country or region over  
122 a selected period [21, 22]. Studies have shown that online query trends correlate with real-  
123 life epidemiologic phenomena such as the flu [23], sinusitis [24], lifestyle-related disease [25],  
124 asthma [26], and pruritus [27]. Researchers have also investigated public interest and  
125 information-seeking behavior in chronic obstructive pulmonary disease (COPD) [28], cancer  
126 [29, 30], bariatric surgery [31], kidney stone surgery [32], and suicide [33]. During the  
127 COVID-19 pandemic, similar studies using Google Trends search data were conducted to  
128 predict COVID-19 infectious cases [34, 35], explore public attitudes toward vaccination [36–  
129 38], identify symptoms caused by pandemics [39–41], and assess affected medical services  
130 [42–44]. The above studies indicate that Google Trends could assist in gaining a better  
131 understanding and analysis of health information-seeking behavior. Information from Google  
132 Trends could be used to supplement the current infection reports with lag time.

133

134 This study aimed to explain HFMD infection using Google Trends data in Japan before and  
135 during the COVID-19 pandemic.

## 136 **Methods**

### 137 **Data**

138 We obtained actual HFMD cases from the weekly reports issued by NIID, which included  
139 new infectious cases and sentinel cases by prefecture and updated them from 1999 to the  
140 present [16]. Additionally, we set the geographic location to Japan and the category to health  
141 to limit irrelevant results and downloaded the relative search volume (RSV) of the “HFMD”  
142 search topic using Google Trends from January 1, 2009, to December 31, 2021. The  
143 normalized RSV data represented the search interest relative to the highest point for a given  
144 region and time. The scales of normalized RSV varied from 0 to 100, where 0 meant there  
145 were insufficient data for a term, while 100 was the peak popularity. We selected a search  
146 topic instead of the search term “HFMD” for comprehensive search information and limited  
147 the period from 2009 to 2021. In this study, we used the search topic “HFMD” and the  
148 search term “HFMD.” The weekly RSV of the search topic “HFMD” from 2009 to 2021 was  
149 gathered for further analysis.

150

151 To identify significant factors of HFMD infection, we created multiple linear regression  
152 models using HFMD-related search terms selected by Japanese tweets. We retrieved  
153 Japanese tweets through the publicly available Twitter Stream application programming  
154 interface (API) by querying the keywords “HFMD” to select “HFMD” related top words.  
155 Google applied improvements to the data collection system on January 1, 2016, and  
156 January 1, 2022, respectively. For consistency, 275,010 tweets restricting between 2016 and  
157 2021 were downloaded in this study. Tokenization was used to select top words in Japanese  
158 tweets, which is a fundamental step in many natural language processing (NLP) methods,  
159 especially for languages like Japanese that are written without spaces between words. We

160 tokenized all tweets and analyzed the unigram tokens. The website links, special characters,  
161 numbers, and “amp” (ampersands) were removed from the tweets before tokenization. The  
162 Python packages SpaCy and GiNZA were used to remove the Japanese stop words and  
163 implement tokenization. White space characters joined the tokenized words into text in the  
164 original order. The Python package scikit-learn was used to convert the white space-joined  
165 texts into unigram and bigram tokens and calculate the token counts. We provided counts of  
166 tokens in **Appendix 1**. Search terms with counts larger than 1000 and belonging to ranges  
167 of infection sources, susceptible sites, susceptible populations, symptoms, treatment,  
168 preventive measures, and identified diseases were selected for further analysis. Selected  
169 terms with corresponding interpretations and categories are provided in **Appendix 2** and  
170 **Appendix 3**. We downloaded the weekly RSV of selected search terms through Google  
171 Trends in two periods: before (2016-2019) and during the pandemic (2020-2021) based on  
172 the first case of COVID-19 in Japan was confirmed on 16 January 2020.

### 173 **Statistical Analysis**

174 Initially, we calculated the Pearson correlation coefficient between the actual HFMD cases  
175 and RSV of the search topic “HFMD” each year from 2009 to 2021 instead of the whole  
176 period due to the periodic characteristic. Since our response variable HFMD cases and  
177 explanatory variables search term RSV are measured on a continuous scale, the parametric  
178 test should typically be selected instead of non-parametric analysis [45].

179  
180 Second, we conducted cross-correlation analysis between actual HFMD cases and RSV of  
181 selected search terms. Cross-correlation is a measure of the similarity between two series  
182 as a function of the displacement of one relative to the other and was used to objectively  
183 estimate the time lag between cases of HFMD infection and related search terms [46]. We  
184 set the maximum lag to  $\pm 20$  weeks due to the periodic characteristics of HFMD infection. We  
185 obtained 40 cross-correlation coefficients for each HFMD-related search term before and  
186 during the COVID-19 pandemic. Next, we selected the coefficients with the greatest absolute  
187 values and exhibited their true values. Finally, we compared the coefficients with the  
188 greatest absolute value in the periods before and during the COVID-19 pandemic.  
189 Regarding these coefficients, we assumed negative, zero, or positive values with the  
190 greatest absolute value representing the search terms that occurred earlier, coincided with,  
191 or later than the actual HFMD cases. Differences in lags during and before the COVID-19  
192 pandemic was calculated to determine public awareness of HFMD.

193  
194 Third, we conducted multiple linear regression to identify the most important Google search  
195 terms for explaining HFMD infection before and during the COVID-19 pandemic. We  
196 included HFMD-related search terms for multiple linear regression explanatory variables,  
197 with actual HFMD cases as response variables. Collinearity is the correlation between  
198 explanatory variables that expresses a linear relationship in a regression model. When the  
199 explanatory variables are correlated in the same regression model, they cannot explain the  
200 response variable dependently. We normalized the RSV of each selected term to avoid  
201 collinearity in regression models. Several common methods were used for explanatory  
202 variable selection to identify the most significant search terms and limit the number of  
203 explanatory variables, including forward selection, backward elimination, and stepwise  
204 regression [47]. Backward elimination was used in this study to find the best subset of  
205 search terms due to its easy implementation and automated availability. We used a p-value

206 threshold of 0.05 to remove unnecessary search terms. In each round, we removed the  
207 search term with the highest p-value and reconstructed a multiple linear regression model  
208 until all p-values were under the threshold.

209

210 To assess the performance of the linear regression model, the coefficients of determination  
211  $R^2$  or adjusted  $R^2$ , which indicates how much variation in response is explained by the model,  
212 are often used [48]. We selected the adjusted  $R^2$  value for model evaluation to avoid  
213 overfitting the model.

## 214 Results

### 215 Basic description of HFMD cases and “HFMD” RSV

216 **Figure 1** presents the actual HFMD and RSV cases from 2009 to 2021. Visual inspection of  
217 the figure indicated that both the actual HFMD cases and RSV of Google Trends peaked  
218 around July in most years except for 2020 and 2021. The number of HFMD infections  
219 surged after 2011, peaking every two years before 2020. The RSV coincided with this trend.  
220 In 2020, no periodic peak of infection was observed, whereas, in 2021, the peak was  
221 delayed to November.

222

223 As shown in **Figure 2**, we calculated the correlation between the actual HFMD cases and  
224 RSV each year from 2009 to 2021. These correlations' mean (standard error) was 0.820  
225 (0.052). Most coefficient values were greater than 0.7, except for 0.338 in 2020. Pearson  
226 correlation coefficients were provided in **Appendix 4**.

227

228 **Figure 1.** Monthly number and RSV of hand, foot, and mouth disease from 2004 to 2021.

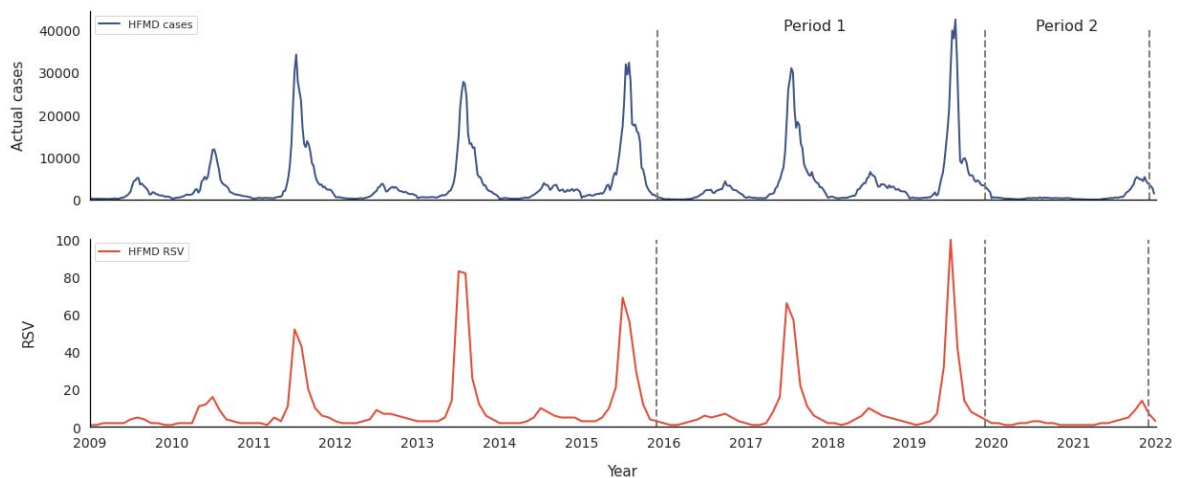

229

230

231

232

233

234

235

236

237  
238  
239  
240  
241  
242

**Figure 2.** Correlation between the hand, foot, and mouth disease cases and the RSV from 2004 to 2021.

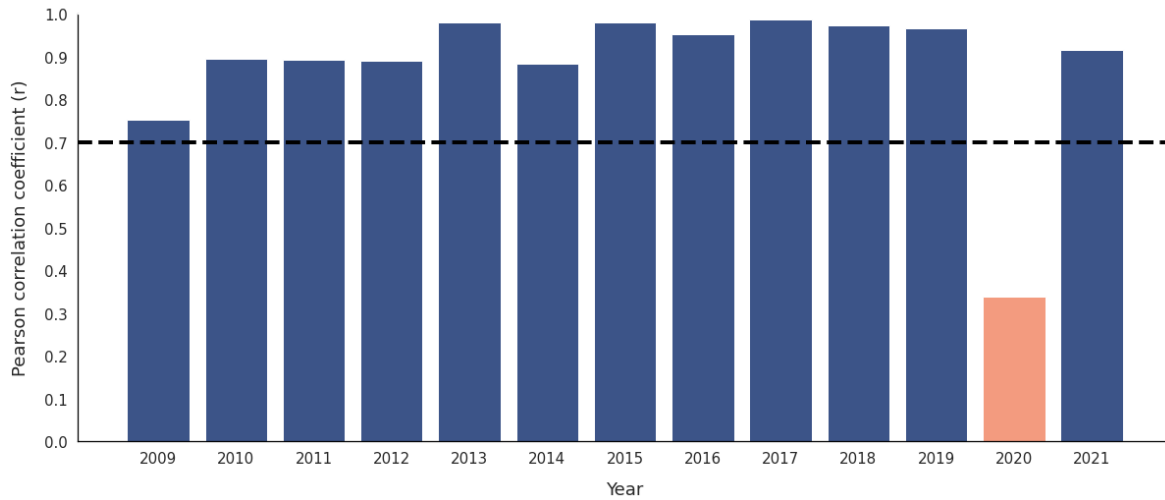

243

244 **Cross-correlation between HFMD cases and search term RSV**  
245 **before and during the pandemic**

246 We performed cross-correlation analysis to determine the temporal relationship between  
247 HFMD cases and search term RSV. Cross-correlation results before and during the  
248 pandemic were presented in **Table 1**.

249

250 Compared with period 1, the temporal correlation between HFMD cases and search term  
251 RSV changed in period 2. In period 1, 61 (60.4%), 6 (5.9%), and 34 (33.7%) of search term  
252 RSV presented earlier, coincide, and later than HFMD cases. In period 2, 73 (72.3%), 1 (1%),  
253 and 27 (26.7%) presented earlier, coincide, and later than HFMD cases. Differences in lags  
254 for 73 (72.3%) search terms were negative, might indicating increasing public awareness of  
255 HFMD infections during the COVID-19 pandemic. In contrast, lags for 5 search terms had no  
256 change, and 23 search terms exhibited delays.

257

258 **Table 1.** Cross-correlation analysis of HFMD cases and search terms RSV

| Search terms<br>(English) | Period 1 (2015-2019) |                     | Period 2 (2020-2021) |                     | Lag<br>changes |
|---------------------------|----------------------|---------------------|----------------------|---------------------|----------------|
|                           | Lags<br>(week)       | Coefficients<br>(r) | Lags<br>(week)       | Coefficients<br>(r) |                |
|                           | /                    |                     | /                    |                     | <b>Earlier</b> |
| hodgkin                   | 19                   | 0.017               | -19                  | 0.08                | -38            |
| lymphoma                  | 19                   | 0.196               | -19                  | 0.056               | -38            |
| visits                    | 19                   | 0.202               | -15                  | 0.167               | -34            |
| vaccine                   | 17                   | 0.662               | -13                  | 0.908               | -30            |

|                           |    |       |     |       |     |
|---------------------------|----|-------|-----|-------|-----|
| fever                     | 19 | 0.096 | -11 | 0.886 | -30 |
| antipyretic drug          | 19 | 0.177 | -11 | 0.926 | -30 |
| chickenpox                | 19 | 0.177 | -11 | 0.498 | -30 |
| reduce fever              | 19 | 0.233 | -10 | 0.816 | -29 |
| examination               | 19 | 0.199 | -10 | 0.573 | -29 |
| low grade fever           | 19 | 0.07  | -9  | 0.178 | -28 |
| pediatric                 | 17 | 0.529 | -6  | 0.639 | -23 |
| child(hiragana)           | 15 | 0.462 | -6  | 0.67  | -21 |
| intense pain              | 2  | 0.093 | -19 | 0.067 | -21 |
| department of dermatology | 1  | 0.422 | -16 | 0.486 | -17 |
| itch (word morphing)      | 0  | 0.554 | -16 | 0.52  | -16 |
| influenza                 | 19 | 0.383 | 3   | 0.203 | -16 |
| rest                      | 2  | 0.428 | -14 | 0.363 | -16 |
| follicles (word morphing) | -2 | 0.478 | -17 | 0.325 | -15 |
| swimming pool             | 0  | 0.625 | -15 | 0.699 | -15 |
| entero-                   | -3 | 0.153 | -17 | 0.319 | -14 |
| adult                     | -1 | 0.669 | -15 | 0.642 | -14 |
| sole of the foot          | -4 | 0.437 | -18 | 0.334 | -14 |
| nasal mucus               | 18 | 0.326 | 4   | 0.13  | -14 |
| follicles(hiragana)       | -1 | 0.42  | -14 | 0.329 | -13 |
| rash                      | -1 | 0.791 | -14 | 0.448 | -13 |
| school-aged children      | -3 | 0.124 | -16 | 0.059 | -13 |
| Pharynx                   | -2 | 0.36  | -15 | 0.15  | -13 |
| septicemia                | 12 | 0.338 | -1  | 0.109 | -13 |
| summer cold               | 1  | 0.598 | -12 | 0.587 | -13 |
| go to kindergarten        | -1 | 0.431 | -14 | 0.418 | -14 |
| adeno-                    | -7 | 0.559 | -19 | 0.644 | -12 |
| adenovirus                | -7 | 0.558 | -19 | 0.663 | -12 |
| COVID-19(short name)      | -1 | 0.012 | -13 | 0.187 | -12 |
| rash(hiragana)            | -1 | 0.227 | -13 | 0.208 | -12 |
| erythema                  | -1 | 0.376 | -13 | 0.427 | -12 |
| young child               | -7 | 0.296 | -19 | 0.433 | -12 |
| kindergarten              | -7 | 0.274 | -19 | 0.129 | -12 |
| influenza (short name)    | 19 | 0.36  | 7   | 0.167 | -12 |
| enterovirus               | -5 | 0.012 | -16 | 0.141 | -11 |



|                                    |     |       |     |       |                 |
|------------------------------------|-----|-------|-----|-------|-----------------|
| Infant                             | -7  | 0.21  | -18 | 0.527 | -11             |
| high fever                         | -1  | 0.147 | -12 | 0.63  | -11             |
| infant (different stages)          | -8  | 0.051 | -19 | 0.109 | -11             |
| palm (colloquial term)             | -6  | 0.459 | -17 | 0.414 | -11             |
| sole of the foot (colloquial term) | -6  | 0.512 | -17 | 0.497 | -11             |
| daycare center                     | -5  | 0.361 | -15 | 0.411 | -10             |
| conjunctivitis                     | -8  | 0.447 | -18 | 0.139 | -10             |
| skin                               | -7  | 0.519 | -17 | 0.492 | -10             |
| exhaustion                         | -9  | 0.47  | -19 | 0.417 | -10             |
| child                              | -7  | 0.069 | -17 | 0.491 | -10             |
| vomiting                           | 19  | 0.218 | 9   | 0.224 | -10             |
| gastroenteritis                    | 19  | 0.159 | 9   | 0.404 | -10             |
| urticaria                          | -3  | 0.58  | -12 | 0.678 | -9              |
| palm (written term)                | -10 | 0.118 | -19 | 0.086 | -9              |
| swelling                           | -3  | 0.513 | -12 | 0.597 | -9              |
| norovirus                          | 19  | 0.11  | 10  | 0.221 | -9              |
| cold                               | 18  | 0.403 | 9   | 0.163 | -9              |
| hospital                           | -7  | 0.239 | -15 | 0.265 | -8              |
| vesicle                            | -1  | 0.595 | -8  | 0.668 | -7              |
| itch(word morphing)                | -8  | 0.272 | -15 | 0.138 | -7              |
| child(mixed)                       | -5  | 0.096 | -12 | 0.629 | -7              |
| coxsackie(virus)                   | -2  | 0.216 | -8  | 0.123 | -6              |
| eczema                             | -6  | 0.451 | -12 | 0.492 | -6              |
| diarrhea                           | -7  | 0.267 | -13 | 0.381 | -6              |
| chlamydia                          | 5   | 0.133 | -1  | 0.226 | -6              |
| chickenpox (colloquial term)       | -5  | 0.411 | -10 | 0.37  | -5              |
| herpangina                         | 0   | 0.575 | -4  | 0.716 | -4              |
| measles                            | -8  | 0.077 | -12 | 0.655 | -4              |
| papule                             | -8  | 0.124 | -12 | 0.237 | -4              |
| appetite                           | -7  | 0.08  | -10 | 0.603 | -3              |
| diagnosis                          | -16 | 0.218 | -19 | 0.276 | -3              |
| child(kanji)                       | -11 | 0.248 | -14 | 0.489 | -3              |
| herpes                             | 19  | 0.267 | 17  | 0.094 | -2              |
| herpes                             | -1  | 0.385 | -2  | 0.815 | -1              |
|                                    | /   |       |     | /     | <b>Coincide</b> |
| oral cavity                        | -19 | 0.248 | -19 | 0.189 | 0               |

| (synonym)                 |     |        |     |        |              |
|---------------------------|-----|--------|-----|--------|--------------|
| aphtha                    | 9   | 0.143  | 9   | 0.143  | 0            |
| gargle                    | 19  | 0.4    | 19  | 0.005  | 0            |
| disinfection              | 19  | 0.078  | 19  | 0.13   | 0            |
| company                   | 19  | 0.183  | 19  | 0.059  | 19           |
|                           |     | /      |     | /      | <b>Later</b> |
| hand and foot             | -1  | 0.976  | 0   | 0.842  | 1            |
| pneumoniae                | 18  | 0.099  | 19  | 0.128  | 1            |
| school                    | 18  | 0.068  | 19  | 0.051  | 19           |
| pain (word morphing)      | -10 | 0.305  | -8  | 0.738  | 2            |
| mycoplasma                | 17  | -0.031 | 19  | 0.143  | 2            |
| stomach                   | -7  | 0.316  | -4  | 0.493  | 3            |
| handwashing               | 15  | 0.255  | 19  | 0.133  | 4            |
| allergy                   | -19 | 0.42   | -13 | 0.412  | 6            |
| itch(hiragana)            | -19 | 0.371  | -12 | 0.41   | 7            |
| pain (word morphing)      | -19 | 0.203  | -10 | 0.309  | 9            |
| pain (word morphing)      | -19 | 0.245  | -8  | 0.313  | 11           |
| headache                  | -19 | 0.032  | -8  | 0.535  | 11           |
| stomatitis                | 0   | 0.52   | 19  | 0.05   | 19           |
| vesicle (colloquial term) | 0   | 0.678  | 19  | -0.002 | 19           |
| meningitis                | 0   | 0.304  | 19  | 0.058  | 19           |
| typhus                    | -4  | 0.084  | 19  | 0.054  | 23           |
| rubella                   | -6  | 0.017  | 19  | 0.086  | 25           |
| hemolytic streptococcus   | -7  | 0.355  | 19  | 0.132  | 26           |
| infant (different stages) | -7  | 0.107  | 19  | 0.083  | 26           |
| legionella                | -18 | 0.282  | 9   | 0.064  | 27           |
| virus                     | -9  | 0.207  | 19  | 0.125  | 28           |
| oral cavity(synonym)      | -19 | 0.084  | 9   | 0.054  | 28           |
| specialty drugs           | -19 | 0.129  | 19  | 0.11   | 38           |

259

260 **Essential search terms for explaining HFMD cases before and**  
 261 **during the pandemic**

262 We identified the most significant search terms for HFMD infection using multiple linear  
 263 regression with backward elimination procedures. As shown in **Table 2**, 18 search terms

264 were significant in period 1 and accounted for an adjusted  $R^2=96.7\%$  of the variation in  
 265 HFMD infection. Conversely, as shown in **Table 3**, 57 search terms were detected as  
 266 significant with adjusted  $R^2=98.4\%$  in period 2, which included more critical variables than in  
 267 period 1. Model specification formulas were provided in **Appendix 5**.

268

269 Compared with period 1, significant search terms in period 2 contained the same meanings  
 270 and expanded informative search content. “Herpangina,” “nasal mucus,” “exhaustion,”  
 271 “diarrhea,” “summer cold,” “young child,” “pediatric,” and “swelling” occurred in the original  
 272 form. “Pain,” “reduce fever,” “oral cavity,” “chickenpox,” “itch,” and “sole of the foot” occurred  
 273 in morphing or synonym forms. “Virus” was replaced by more specific infection sources in  
 274 period 2, such as “adenovirus,” “entero-,” “coxsackie,” “mycoplasma,” “legionella,” and  
 275 “hemolytic streptococcus.” Correspondingly, “adult” was superseded by other terms for  
 276 susceptible populations, such as “child” and “infant” (Omit synonyms). Search terms related  
 277 to susceptible sites, preventive measures, and treatment also were identified in period 2,  
 278 such as “daycare center,” “kindergarten,” “handwashing,” “disinfection,” “hospital,” and  
 279 “specialty drugs.” Multiple linear regression results corroborated the cross-correlation results  
 280 and indicated that public awareness of HFMD might increase during COVID-19.

281

282 **Table 2.** Multiple linear regression model of the hand, foot, and mouth disease cases and  
 283 relative search volume of selected search terms from 2016 to 2019

| Search terms (English)       | Model summary        |           |         |
|------------------------------|----------------------|-----------|---------|
|                              | Standardized $\beta$ | Std.Error | P-value |
| virus                        | 0.0507               | 0.019     | 0.007   |
| herpangina                   | -0.1034              | 0.033     | 0.002   |
| diarrhea                     | -0.0998              | 0.021     | <0.001  |
| oral cavity (synonym)        | 0.0290               | 0.015     | 0.049   |
| summer cold                  | 0.1361               | 0.037     | <.001   |
| adult                        | 0.1306               | 0.032     | <.001   |
| young child                  | -0.0372              | 0.017     | 0.032   |
| pediatric                    | 0.0641               | 0.019     | 0.001   |
| hand and foot                | 0.8575               | 0.026     | <0.001  |
| chickenpox (colloquial term) | -0.0634              | 0.018     | 0.001   |
| eczema                       | 0.0506               | 0.018     | 0.006   |
| intense pain                 | 0.0361               | 0.014     | 0.010   |
| exhaustion                   | -0.0474              | 0.021     | 0.024   |
| itch (word morphing)         | 0.0468               | 0.019     | 0.014   |
| swelling                     | -0.0481              | 0.022     | 0.033   |
| reduce fever                 | -0.1042              | 0.021     | <0.001  |
| sole of the foot             | -0.0589              | 0.023     | 0.012   |
| nasal mucus                  | -0.0743              | 0.023     | 0.001   |

1. Adjusted  $R^2 = 96.7\%$

284

285 **Table 3.** Multiple linear regression of the hand, foot, and mouth disease cases and relative  
 286 search volume of selected search terms between 2020 and 2021

| Search terms (English) | Model summary |
|------------------------|---------------|
|------------------------|---------------|

|                           | Standardized<br>$\beta$ | Std.Error | P-value |
|---------------------------|-------------------------|-----------|---------|
| adenovirus                | -0.2816                 | 0.04      | <0.001  |
| influenza (short name)    | -0.1938                 | 0.062     | 0.003   |
| entero-                   | 0.1566                  | 0.021     | <0.001  |
| stomach                   | 0.0897                  | 0.028     | 0.002   |
| coxsackie (virus)         | 0.0446                  | 0.02      | 0.034   |
| child (hiragana)          | -0.4402                 | 0.111     | <0.001  |
| COVID-19 (short name)     | 0.6273                  | 0.102     | <0.001  |
| follicles(katagana)       | 0.1868                  | 0.029     | <0.001  |
| herpangina                | 0.8604                  | 0.044     | <0.001  |
| herpes                    | -0.3042                 | 0.042     | <0.001  |
| hodgkin                   | 0.0464                  | 0.017     | 0.009   |
| mycoplasma                | 0.1905                  | 0.069     | 0.008   |
| legionella                | 0.1888                  | 0.025     | <0.001  |
| vaccine                   | -1.1388                 | 0.136     | <0.001  |
| diarrhea                  | 0.2803                  | 0.056     | <0.001  |
| papule                    | 0.0863                  | 0.02      | <0.001  |
| infant (different stages) | -0.2984                 | 0.034     | <0.001  |
| infant (different stages) | 0.0712                  | 0.024     | 0.005   |
| daycare center            | 0.3336                  | 0.049     | <0.001  |
| visits                    | 0.1898                  | 0.038     | <0.001  |
| oral cavity (synonym)     | 0.1055                  | 0.034     | 0.004   |
| pharynx                   | 0.1182                  | 0.022     | <0.001  |
| vomiting                  | -0.0955                 | 0.046     | 0.045   |
| summer cold               | -0.9272                 | 0.061     | <0.001  |
| child (mixed)             | 0.1727                  | 0.045     | <0.001  |
| child (kanji)             | 0.2808                  | 0.041     | <0.001  |
| young child               | -0.2281                 | 0.049     | <0.001  |
| pediatric                 | 0.6066                  | 0.114     | <0.001  |
| child                     | 0.1418                  | 0.045     | 0.003   |
| kindergarten              | -0.2225                 | 0.043     | <0.001  |
| palm (colloquial term)    | 0.1388                  | 0.029     | <0.001  |
| handwashing               | -0.1137                 | 0.051     | 0.031   |
| septicemia                | 0.1228                  | 0.017     | <0.001  |
| vesicle (colloquial term) | -0.2038                 | 0.037     | <0.001  |
| vesicle                   | 0.1718                  | 0.035     | <0.001  |
| chickenpox                | 0.0902                  | 0.021     | <0.001  |
| disinfection              | -0.4493                 | 0.082     | <0.001  |
| hemolytic streptococcus   | 0.3638                  | 0.086     | <0.001  |
| specialty drugs           | -0.4039                 | 0.047     | <0.001  |
| herpes                    | 0.1362                  | 0.042     | 0.002   |
| exhaustion                | -0.3952                 | 0.041     | <0.001  |
| hospital                  | -0.214                  | 0.05      | <0.001  |
| itch (word morphing)      | 0.1993                  | 0.032     | <0.001  |

|                                    |         |       |        |
|------------------------------------|---------|-------|--------|
| pain (word morphing)               | -0.2462 | 0.047 | <0.001 |
| pain (word morphing)               | -0.2206 | 0.029 | <0.001 |
| rash                               | -0.2028 | 0.055 | 0.001  |
| skin                               | 0.1754  | 0.04  | <0.001 |
| conjunctivitis                     | -0.1782 | 0.035 | <0.001 |
| pneumoniae                         | 0.3648  | 0.06  | <0.001 |
| swelling                           | 0.152   | 0.043 | 0.001  |
| urticaria                          | 0.747   | 0.147 | <0.001 |
| antipyretic drug                   | 0.3263  | 0.105 | 0.003  |
| infant                             | 0.2101  | 0.035 | <0.001 |
| sole of the foot (colloquial term) | -0.2455 | 0.052 | <0.001 |
| high fever                         | 0.1784  | 0.07  | 0.014  |
| measles                            | -0.5895 | 0.126 | <0.001 |
| nasal mucus                        | -0.2792 | 0.05  | <0.001 |

---

1. Adjusted R2 = 98.4%

287

288

## Discussion

289

This study presented trends and correlations in HFMD cases and RSV of “HFMD” from 2009 to 2021. Cross-correlation analyses were conducted between HFMD cases and search terms RSV before and during the pandemic. Additionally, multiple linear regressions were used to identify the significant search terms for explaining HFMD cases in two periods. Our results indicated that HFMD cases and RSV peaked around July in most years, except in 2020 and 2021, and surged after 2011 with peaks every two years before 2020. The search topic “HFMD” exhibited strong correlations with HFMD cases except in 2020, when COVID-19 outbreaked. Furthermore, cross-correlation and multiple regression results revealed that the public might have improved awareness of HFMD infection during the pandemic. To our knowledge, this study is the first to explain HFMD cases using Google search data and examine changes in information-seeking behavior towards HFMD affected by the COVID-19 pandemic. Google search data could supplement public health surveillance and help authorities respond to infectious diseases rapidly.

302

303

From 2009 to 2021, the RSV of “HFMD” coincided with the HFMD cases except in 2020, which showed similar trends and peaks. In Japan, HFMD peaks generally occur around July [5]. During the COVID-19 pandemic, different from previous HFMD peaks disappeared in 2020 and lagged to November 2021. In 2020, Google Trends search data did not match the “HFMD” cases, with a relatively small peak in July. Despite a small peak in the RSV of search topic “HFMD”, the volume was much lower than in previous years. In contrast, the Japanese government implemented several measures to control COVID-19 that might potentially influence the spread of HFMD. Respiratory droplets and contact routes were mainly infection routes in HFMD and COVID-19 [49, 50]. Therefore, the susceptible population of HFMD also stay safe by taking standard precautions during COVID-19, such as physical distancing, wearing a mask, regularly washing hands, and coughing into a bent elbow or tissue [51].

315

316 The global pandemic might have enhanced public awareness of HFMD in addition to  
317 COVID-19 from the evidence provided by our results. 73 (72.3%) search terms cross-  
318 correlated earlier with HFMD cases during COVID-19, and significant search terms detected  
319 in period 2 contain more informative information. Previous studies demonstrated that the  
320 prevalence of respiratory infectious diseases reduced during the COVID-19 pandemic, such  
321 as influenza, varicella, herpes zoster, rubella, and measles [52–58]. This might have been  
322 due to adherence to non-pharmaceutical interventions and lower non-polio enterovirus  
323 activity during the COVID-19 pandemic compared with 2014-2019 [59]. Switzerland had an  
324 unprecedented complete absence of pediatric enteroviral meningitis in 2020 [60]. In Japan,  
325 community-acquired pneumonia [61] and influenza [62] admissions have been reduced  
326 during the COVID-19 pandemic. COVID-19 preventative actions and better personal hygiene  
327 are beneficial for preventing the spread of diseases. However, the prevalence of common  
328 diseases may rise as the public gradually complies less with infection control measures in  
329 the upcoming season [61]. Consistent with our results, a peak in HFMD infection and public  
330 interest re-occurred in November 2021. Continuous monitoring of HFMD is required, and  
331 public information-seeking behavior may be helpful in public health surveillance.

332  
333 Google search data was applied in our study to explain HFMD cases affected by COVID-19  
334 instead of Baidu search data was used for real-time estimation of HFMD cases in China [15]  
335 and other categories of data for HFMD prediction or explanation [11–14]. Differing from  
336 previous studies, we paid attention to the distinction between the information-seeking  
337 behavior of HFMD before and during COVID-19 and attempted to explain the HFMD cases  
338 using Google Trends data which has the most market share in Japan [17]. Many researchers  
339 have shown that the Google search data represents the public interest in a specific topic.  
340 However, Google search data should be used cautiously as a surveillance system because  
341 large events can easily interfere with it. Combing fine-grained data like mobility data could  
342 help develop surveillance systems that can effectively exclude biased or irrelevant  
343 information to respond rapidly [63].

## 344 **Conclusion**

345 This study described trends and correlations in HFMD cases with RSV of “HFMD” and  
346 identified significant search terms to explain HFMD infections before and during the COVID-  
347 19 pandemic. We found the prevalence of HFMD was abnormal during COVID-19, and  
348 public might enhance awareness of HFMD infection affected by the pandemic. It is critical to  
349 continuously monitor resurgent common infections as the public gradually reduces  
350 compliance with infection control measures. Public information-seeking behavior using  
351 Google search data may be useful for public health surveillance.

## 352 **Limitations**

353 This study had several limitations. First, our findings are limited to those who used Google to  
354 search for health-related information, which may not represent the entire community. The  
355 results may be biased toward younger people, who are more digitally connected than older  
356 individuals, although the Google search engine market share in Japan is nearly 80% [17].  
357 Second, Google Trends improved geographical assignment and data collection systems in

358 2011, 2016, and 2022. Our results in the basic description of HFMD cases and “HFMD” RSV  
359 might be affected by them. Third, search data analysis is hypersensitive to large events, so  
360 complementary instead of replacing traditional research methods. Fourth, the specific  
361 HFMD-related terms we selected by Twitter might not represent all search terms in public  
362 use, especially hiragana, katakana, kanji, and alphabets used in Japan. Fifth, we used  
363 search data from 2016 to 2019 to represent the period before the COVID-19 pandemic due  
364 to restrictions of Google Trends, which may not represent the entire period. Finally, during  
365 the processing of backward elimination for regression model construction, significant terms  
366 might be eliminated due to jointly insignificant. Although we can find out potential significant  
367 terms from all eliminated terms, it is unpracticable to conduct F-test multiple times because  
368 multiple hypothesis testing leads to lower confidence levels. Hence, we remained current  
369 processing results.

## 370 Abbreviations

371 HFMD: hand, foot, and mouth disease  
372 EV-A71: enterovirus A71  
373 CV-A6: coxsackievirus A6  
374 CV-A16: coxsackievirus A16  
375 NIID: National Institute of Infectious Disease  
376 LDE: logistic differential equation  
377 L-DNM: landscape dynamic network marker  
378 COPD: chronic obstructive pulmonary disease  
379 RSV: relative search volume

## 380 Declarations

381 **Ethics Approval:** All methods were carried out in accordance with relevant guidelines and  
382 regulations (DECLARATION OF HELSINKI). Ethical approval and consent to participate  
383 were not necessary as the study was based on openly available aggregated data.

384 **Consent for Publication:** Not applicable

385 **Availability of Data and Materials:** We used publicly available data published by Google  
386 Trends and the National Institute of Infectious Disease, Japan. All data generated or  
387 analyzed during this study are included in this published article (**Appendix 6**).

388 **Competing Interests:** The authors declare that they have no competing interests.

389 **Funding:** This work was supported by the Japan Science and Technology for pioneering  
390 research initiated by the next generation (SPRING; grant number JPMJSP2110).

391 **Authors' Contributions:** QN, JL, MNT, and TA contributed to the study conception and  
392 design. QN, ZZ, AB, KH, MO, and AK collected data. QN, JL, and ZZ participated in data  
393 analysis and interpretation and drafted the manuscript. All authors contributed to the  
394 manuscript revision and approved the final version of the manuscript.

395 **Acknowledgments:** I appreciate support by 2022-2023 Google PhD Fellowship.

396

## 397 **References**

- 398 1. Huang J, Liao Q, Ooi MH, Cowling BJ, Chang Z, Wu P, et al. Epidemiology of recurrent  
399 hand, foot and mouth disease, China, 2008-2015. *Emerg Infect Dis.* 2018;24.
- 400 2. Wang J, Hu T, Sun D, Ding S, Carr MJ, Xing W, et al. Epidemiological characteristics of  
401 hand, foot, and mouth disease in Shandong, China, 2009–2016. *Sci Rep.* 2017;7:1–9.
- 402 3. Puenpa J, Wanlapakorn N, Vongpunsawad S, Poovorawan Y. The History of Enterovirus  
403 A71 Outbreaks and Molecular Epidemiology in the Asia-Pacific Region. *J Biomed Sci.*  
404 2019;26:75.
- 405 4. Biggs HM. Hand, foot, & mouth disease - chapter 4 - 2020 Yellow Book.  
406 [https://wwwnc.cdc.gov/travel/yellowbook/2020/travel-related-infectious-diseases/hand-foot-](https://wwwnc.cdc.gov/travel/yellowbook/2020/travel-related-infectious-diseases/hand-foot-and-mouth-disease)  
407 [and-mouth-disease](https://wwwnc.cdc.gov/travel/yellowbook/2020/travel-related-infectious-diseases/hand-foot-and-mouth-disease). Accessed 26 Sep 2022.
- 408 5. Koh WM, Bogich T, Siegel K, Jin J, Chong EY, Tan CY, et al. The Epidemiology of Hand,  
409 Foot and Mouth Disease in Asia: A Systematic Review and Analysis. *Pediatr Infect Dis J.*  
410 2016;35:e285-300.
- 411 6. Ministry of Health, Labour and Welfare. National Institute of Infectious Diseases.  
412 *Infectious Disease Weekly Report (JAPAN IDWR).* 2009;11.
- 413 7. Fujimoto T, Iizuka S, Enomoto M, Abe K, Yamashita K, Hanaoka N, et al. Hand, foot, and  
414 mouth disease caused by coxsackievirus A6, Japan, 2011. *Emerg Infect Dis.* 2012;18:337–  
415 9.
- 416 8. Kabele P, Mojhová M, Smíšková D. Hand-foot-mouth disease in puerperium. *Ceska*  
417 *Gynekol.* 2022;87:47–9.
- 418 9. IDWR 2019 No. 29 <Infectious Diseases to Watch> Hand, Foot, and Mouth Disease.  
419 2014. <https://www.niid.go.jp/niid/ja/hfmd-m/hfmd-idwrc/9017-idwrc-1929.html>. Accessed 23  
420 Aug 2022.
- 421 10. Sun BJ, Chen HJ, Chen Y, An XD, Zhou BS. The Risk Factors of Acquiring Severe  
422 Hand, Foot, and Mouth Disease: A Meta-Analysis. *Can J Infect Dis Med Microbiol.*  
423 2018;2018:2751457.
- 424 11. Rui J, Luo K, Chen Q, Zhang D, Zhao Q, Zhang Y, et al. Early warning of hand, foot, and  
425 mouth disease transmission: A modeling study in mainland, China. *PLoS Negl Trop Dis.*  
426 2021;15:e0009233.
- 427 12. Yu G, Feng H, Feng S, Zhao J, Xu J. Forecasting hand-foot-and-mouth disease cases  
428 using wavelet-based SARIMA–NNAR hybrid model. *PLoS One.* 2021;16:e0246673.
- 429 13. Zhang X, Xie R, Liu Z, Pan Y, Liu R, Chen P. Identifying pre-outbreak signals of hand,  
430 foot and mouth disease based on landscape dynamic network marker. *BMC Infect Dis.*  
431 2021;21 Suppl 1:6.
- 432 14. Gao Q, Liu Z, Xiang J, Tong M, Zhang Y, Wang S, et al. Forecast and early warning of  
433 hand, foot, and mouth disease based on meteorological factors: Evidence from a multicity  
434 study of 11 meteorological geographical divisions in mainland China. *Environ Res.*  
435 2021;192:110301.
- 436 15. Zhao Y, Xu Q, Chen Y, Tsui KL. Using Baidu index to nowcast hand-foot-mouth disease



- 437 in China: a meta learning approach. *BMC Infect Dis.* 2018;18:398.
- 438 16. IDWR Surveillance Data Table 2022 week 18. 2022.  
439 [https://www.niid.go.jp/niid/en/surveillance-data-table-english/11133-idwr-sokuho-data-e-](https://www.niid.go.jp/niid/en/surveillance-data-table-english/11133-idwr-sokuho-data-e-2218.html)  
440 [2218.html](https://www.niid.go.jp/niid/en/surveillance-data-table-english/11133-idwr-sokuho-data-e-2218.html). Accessed 23 Aug 2022.
- 441 17. Search Engine Market Share Japan. StatCounter Global Stats.  
442 <https://gs.statcounter.com/search-engine-market-share/all/japan>. Accessed 27 Sep 2022.
- 443 18. Search Engine Marketing Share around the World from US, Europe and Asia. Chandler  
444 Nguyen. 2008. [https://www.chandlernguyen.com/blog/2008/11/29/search-engine-marketing-](https://www.chandlernguyen.com/blog/2008/11/29/search-engine-marketing-share-around-the-world-from-us-europe-and-asia/)  
445 [share-around-the-world-from-us-europe-and-asia/](https://www.chandlernguyen.com/blog/2008/11/29/search-engine-marketing-share-around-the-world-from-us-europe-and-asia/). Accessed 27 Sep 2022.
- 446 19. Eysenbach G. Infodemiology and infoveillance: framework for an emerging set of public  
447 health informatics methods to analyze search, communication and publication behavior on  
448 the Internet. *J Med Internet Res.* 2009;11:e11.
- 449 20. Mavragani A, Ochoa G, Tsagarakis KP. Assessing the Methods, Tools, and Statistical  
450 Approaches in Google Trends Research: Systematic Review. *J Med Internet Res.*  
451 2018;20:e270.
- 452 21. Nuti SV, Wayda B, Ranasinghe I, Wang S, Dreyer RP, Chen SI, et al. The use of google  
453 trends in health care research: a systematic review. *PLoS One.* 2014;9:e109583.
- 454 22. Mavragani A, Ochoa G. Google Trends in Infodemiology and Infoveillance: Methodology  
455 Framework. *JMIR Public Health Surveill.* 2019;5:e13439.
- 456 23. Pervaiz F, Pervaiz M, Abdur Rehman N, Saif U. FluBreaks: early epidemic detection  
457 from Google flu trends. *J Med Internet Res.* 2012;14:e125.
- 458 24. Sharma D, Sandelski MM, Ting J, Higgins TS. Correlations in Trends of Sinusitis-Related  
459 Online Google Search Queries in the United States. *Am J Rhinol Allergy.* 2020;34:482–6.
- 460 25. Memon SA, Razak S, Weber I. Lifestyle Disease Surveillance Using Population Search  
461 Behavior: Feasibility Study. *J Med Internet Res.* 2020;22:e13347.
- 462 26. Mavragani A, Sampri A, Sypsa K, Tsagarakis KP. Integrating Smart Health in the US  
463 Health Care System: Infodemiology Study of Asthma Monitoring in the Google Era. *JMIR*  
464 *Public Health Surveill.* 2018;4:e24.
- 465 27. Tizek L, Schielein M, R uth M, St ander S, Pereira MP, Eberlein B, et al. Influence of  
466 Climate on Google Internet Searches for Pruritus Across 16 German Cities: Retrospective  
467 Analysis. *J Med Internet Res.* 2019;21:e13739.
- 468 28. Boehm A, Pizzini A, Sonnweber T, Loeffler-Ragg J, Lamina C, Weiss G, et al. Assessing  
469 global COPD awareness with Google Trends. *Eur Respir J.* 2019;53.
- 470 29. Schootman M, Toor A, Cavazos-Rehg P, Jeffe DB, McQueen A, Eberth J, et al. The  
471 utility of Google Trends data to examine interest in cancer screening. *BMJ Open.*  
472 2015;5:e006678.
- 473 30. Phillips CA, Barz Leahy A, Li Y, Schapira MM, Bailey LC, Merchant RM. Relationship  
474 Between State-Level Google Online Search Volume and Cancer Incidence in the United  
475 States: Retrospective Study. *J Med Internet Res.* 2018;20:e6.
- 476 31. Linkov F, Bovbjerg DH, Freese KE, Ramanathan R, Eid GM, Gourash W. Bariatric  
477 surgery interest around the world: what Google Trends can teach us. *Surg Obes Relat Dis.*

- 478 2014;10:533–8.
- 479 32. Dreher PC, Tong C, Ghiraldi E, Friedlander JI. Use of Google Trends to Track Online  
480 Behavior and Interest in Kidney Stone Surgery. *Urology*. 2018;121:74–8.
- 481 33. Taira K, Hosokawa R, Itatani T, Fujita S. Predicting the Number of Suicides in Japan  
482 Using Internet Search Queries: Vector Autoregression Time Series Model. *JMIR Public*  
483 *Health Surveill*. 2021;7:e34016.
- 484 34. Husnayain A, Shim E, Fuad A, Su EC-Y. Predicting New Daily COVID-19 Cases and  
485 Deaths Using Search Engine Query Data in South Korea From 2020 to 2021: Infodemiology  
486 Study. *J Med Internet Res*. 2021;23:e34178.
- 487 35. Higgins TS, Wu AW, Sharma D, Illing EA, Rubel K, Ting JY, et al. Correlations of Online  
488 Search Engine Trends With Coronavirus Disease (COVID-19) Incidence: Infodemiology  
489 Study. *JMIR Public Health Surveill*. 2020;6:e19702.
- 490 36. Pullan S, Dey M. Vaccine hesitancy and anti-vaccination in the time of COVID-19: A  
491 Google Trends analysis. *Vaccine*. 2021;39:1877–81.
- 492 37. Diaz P, Reddy P, Ramasahayam R, Kuchakulla M, Ramasamy R. COVID-19 vaccine  
493 hesitancy linked to increased internet search queries for side effects on fertility potential in  
494 the initial rollout phase following Emergency Use Authorization. *Andrologia*. 2021;53.
- 495 38. An L, Russell DM, Mihalcea R, Bacon E, Huffman S, Resnicow K. Online Search  
496 Behavior Related to COVID-19 Vaccines: Infodemiology Study. *JMIR Infodemiology*.  
497 2021;1:e32127.
- 498 39. Han J, Kamat S, Agarwal A, O'Hagan R, Tukel C, Owji S, et al. Correlation Between  
499 Interest in COVID-19 Hair Loss and COVID-19 Surges: Analysis of Google Trends. *JMIR*  
500 *Dermatol*. 2022;5:e37271.
- 501 40. Kardeş S, Erdem A, Gürdal H. Public interest in musculoskeletal symptoms and  
502 disorders during the COVID-19 pandemic : Infodemiology study. *Z Rheumatol*. 2022;81:247–  
503 52.
- 504 41. Knipe D, Gunnell D, Evans H, John A, Fancourt D. Is Google Trends a useful tool for  
505 tracking mental and social distress during a public health emergency? A time-series  
506 analysis. *J Affect Disord*. 2021;294:737–44.
- 507 42. Cohen SA, Ebrahimian S, Cohen LE, Tijerina JD. Online public interest in common  
508 malignancies and cancer screening during the COVID-19 pandemic in the United States.  
509 *Transl Res*. 2021;7:723–32.
- 510 43. Akpan IJ, Aguolu OG, Kobara YM, Razavi R, Akpan AA, Shanker M. Association  
511 Between What People Learned About COVID-19 Using Web Searches and Their Behavior  
512 Toward Public Health Guidelines: Empirical Infodemiology Study. *J Med Internet Res*.  
513 2021;23:e28975.
- 514 44. Adelhoefer S, Berning P, Solomon SB, Maybody M, Whelton SP, Blaha MJ, et al.  
515 Decreased public pursuit of cancer-related information during the COVID-19 pandemic in the  
516 United States. *Cancer Causes Control*. 2021;32:577–85.
- 517 45. Benesty J, Chen J, Huang Y, Cohen I. Pearson Correlation Coefficient. In: Cohen I,  
518 Huang Y, Chen J, Benesty J, editors. *Noise Reduction in Speech Processing*. Berlin,  
519 Heidelberg: Springer Berlin Heidelberg; 2009. p. 1–4.

- 520 46. Bourke. Cross correlation. Cross Correlation", Auto Correlation—2D Pattern.
- 521 47. Tranmer, Elliot. Multiple linear regression. Cathie Marsh Centre for Census ....
- 522 48. Akossou, Palm. Impact of data structure on the estimators R-square and adjusted R-  
523 square in linear regression. *Int J Math Comput*.
- 524 49. Huang C, Wang Y, Li X, Ren L, Zhao J, Hu Y, et al. Clinical features of patients infected  
525 with 2019 novel coronavirus in Wuhan, China. *Lancet*. 2020;395:497–506.
- 526 50. CDC. Causes & transmission. Centers for Disease Control and Prevention. 2022.  
527 <https://www.cdc.gov/hand-foot-mouth/about/transmission.html>. Accessed 28 Sep 2022.
- 528 51. Coronavirus disease (COVID-19): How is it transmitted? [https://www.who.int/news-](https://www.who.int/news-room/questions-and-answers/item/coronavirus-disease-covid-19-how-is-it-transmitted)  
529 [room/questions-and-answers/item/coronavirus-disease-covid-19-how-is-it-transmitted](https://www.who.int/news-room/questions-and-answers/item/coronavirus-disease-covid-19-how-is-it-transmitted).  
530 Accessed 28 Sep 2022.
- 531 52. Sakamoto H, Ishikane M, Ueda P. Seasonal Influenza Activity During the SARS-CoV-2  
532 Outbreak in Japan. *JAMA*. 2020;323:1969–71.
- 533 53. Wu D, Liu Q, Wu T, Wang D, Lu J. The impact of COVID-19 control measures on the  
534 morbidity of varicella, herpes zoster, rubella and measles in Guangzhou, China. *Immun*  
535 *Inflamm Dis*. 2020;8:844–6.
- 536 54. Wu D, Lu J, Liu Y, Zhang Z, Luo L. Positive effects of COVID-19 control measures on  
537 influenza prevention. *Int J Infect Dis*. 2020;95:345–6.
- 538 55. Kies KD, Thomas AS, Binnicker MJ, Bashynski KL, Patel R. Decrease in Enteroviral  
539 Meningitis: An Unexpected Benefit of Coronavirus Disease 2019 (COVID-19) Mitigation?  
540 *Clin Infect Dis*. 2021;73:e2807–9.
- 541 56. Veiga ABG da, Martins LG, Riediger I, Mazetto A, Debur M do C, Gregianini TS. More  
542 than just a common cold: Endemic coronaviruses OC43, HKU1, NL63, and 229E associated  
543 with severe acute respiratory infection and fatality cases among healthy adults. *J Med Virol*.  
544 2021;93:1002–7.
- 545 57. Li Q, Wang J, Lv H, Lu H. Impact of China's COVID-19 prevention and control efforts on  
546 outbreaks of influenza. *Biosci Trends*. 2021;15:192–5.
- 547 58. Wan WY, Thoon KC, Loo LH, Chan KS, Oon LLE, Ramasamy A, et al. Trends in  
548 Respiratory Virus Infections During the COVID-19 Pandemic in Singapore, 2020. *JAMA*  
549 *Netw Open*. 2021;4:e2115973.
- 550 59. Kuo S-C, Tsou H-H, Wu H-Y, Hsu Y-T, Lee F-J, Shih S-M, et al. Nonpolio Enterovirus  
551 Activity during the COVID-19 Pandemic, Taiwan, 2020. *Emerg Infect Dis*. 2021;27.
- 552 60. Stoffel L, Agyeman PKA, Keitel K, Barbani MT, Duppenhaler A, Kopp MV, et al. Striking  
553 Decrease of Enteroviral Meningitis in Children During the COVID-19 Pandemic. *Open Forum*  
554 *Infect Dis*. 2021;8:ofab115.
- 555 61. Yan Y, Tomooka K, Naito T, Tanigawa T. Decreased number of inpatients with  
556 community-acquired pneumonia during the COVID-19 pandemic: A large multicenter study  
557 in Japan. *J Infect Chemother*. 2022;28:709–13.
- 558 62. Hirose T, Katayama Y, Tanaka K, Kitamura T, Nakao S, Tachino J, et al. Reduction of  
559 influenza in Osaka, Japan during the COVID-19 outbreak: a population-based ORION  
560 registry study. *IJID Regions*. 2021;1:79–81.

561 63. Arık SÖ, Shor J, Sinha R, Yoon J, Ledsam JR, Le LT, et al. A prospective evaluation of  
562 AI-augmented epidemiology to forecast COVID-19 in the USA and Japan. NPJ Digit Med.  
563 2021;4:146.

564
